# Supplementary material for: Interaction between Bovine Serum Albumin in Fresh Milk Cream and Encapsulated and Non-Encapsulated Polyphenols of Tamarillo
Source: MDPI journal article supplement (doi:10.3390/antiox12081611), 2023-08-14
Supplement: s1 [file s1]

## Supplementary Materials:

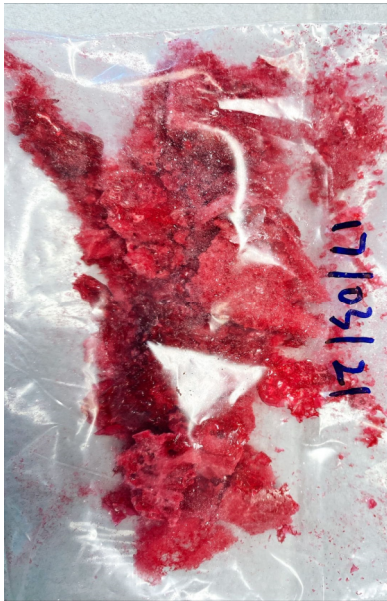

**Figure S1.** A photograph of the encapsulated tamarillo extract with maltodextrin, in 10% w/w.

Calculation of total phenolic content in mg of gallic acid equivalent per g of extracted powder:

$$= \frac{\text{Final concentration (mg/L)} \times \text{volume of extract (0.01L)} \times \text{dilution factor (100)}}{\text{weight of sample (g)}}$$

Calculation of antioxidant capacity in mg of Trolox equivalent per g of extracted powder:

$$= \frac{\text{Final concentration} \left( \frac{\text{mg}}{\text{L}} \right) \times \text{volume of extract (0.01L)}}{\text{weight of sample (g)}}$$

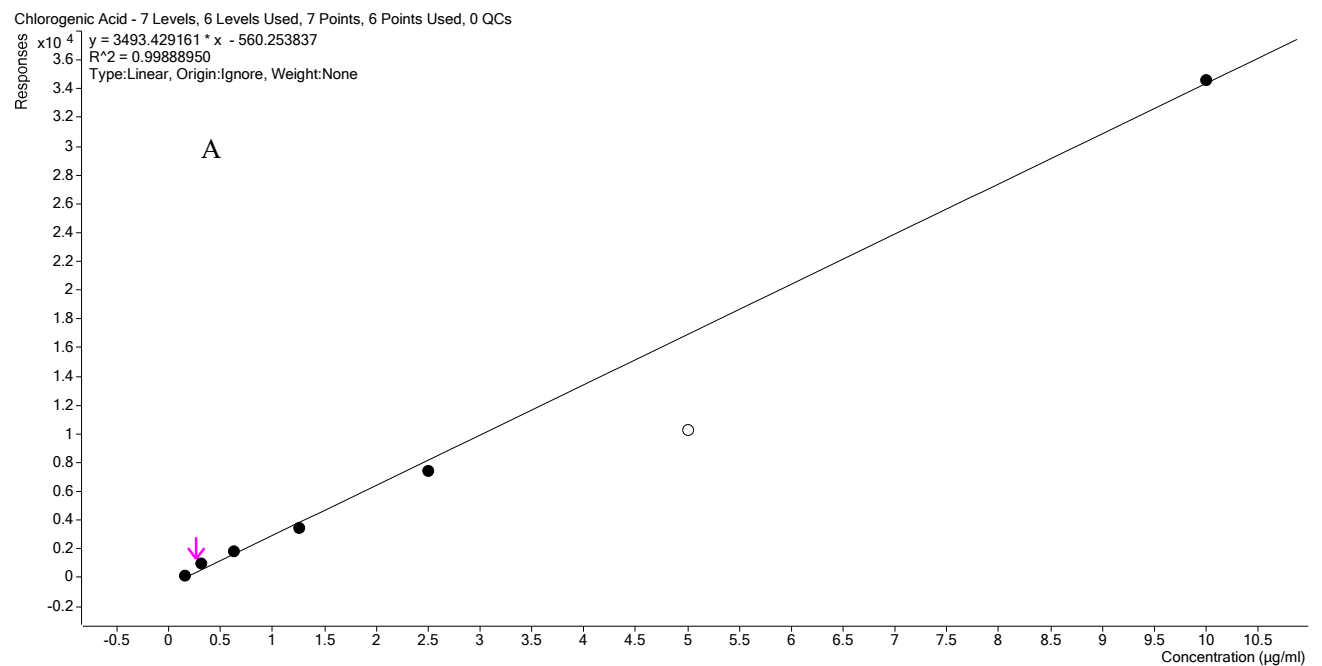

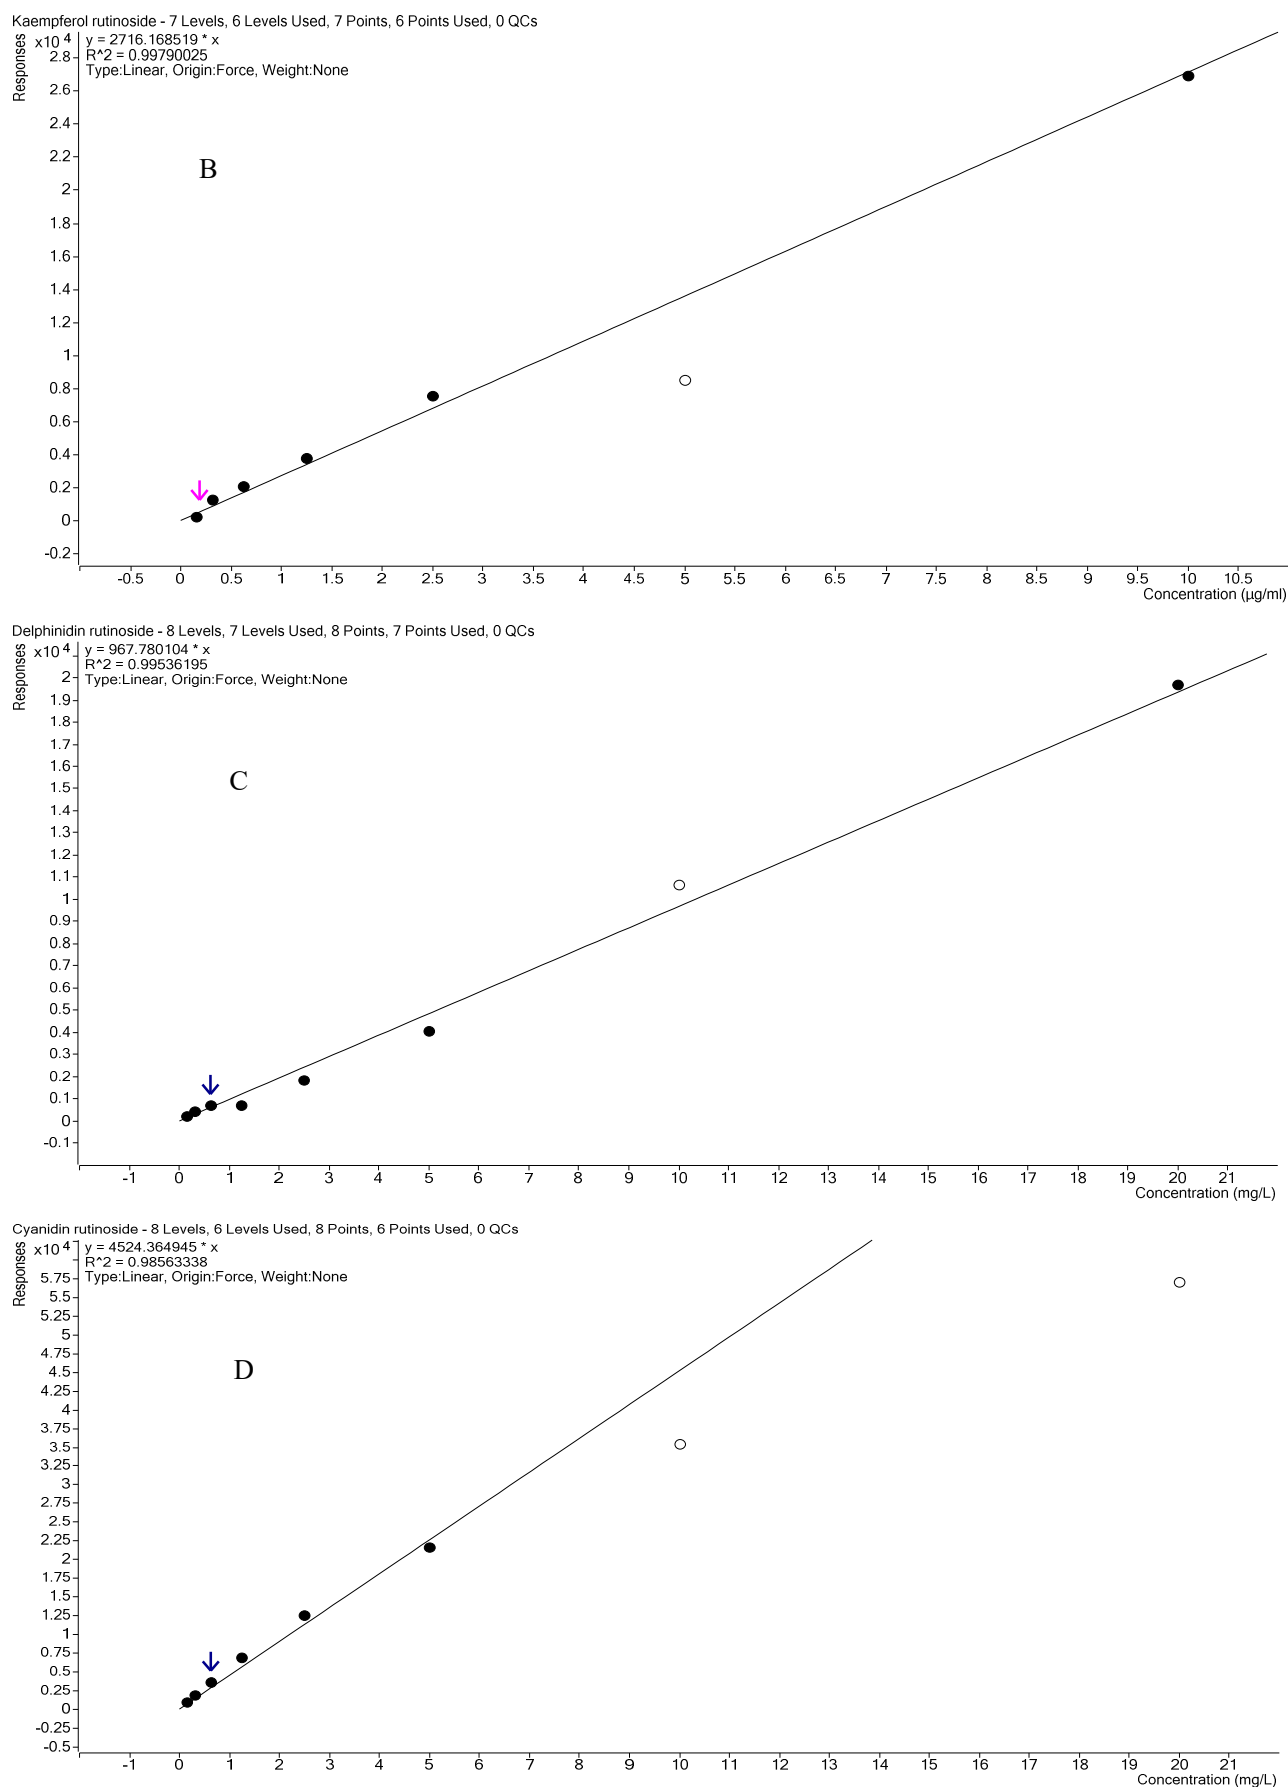

**Figure S2.** Calibration curve of phenolic and anthocyanin content determined by LC-MS. A represents the concentration of chlorogenic acid in unit of  $\mu\text{g/L}$ , B represents the concentration of kaempferol-3-rutinoside in

$\mu\text{g/L}$ , C represents the concentration of delphinidin-3-rutinoside in  $\text{mg/L}$ , and D represents the concentration of pelargonidin-3-rutinoside in  $\text{mg/L}$ .

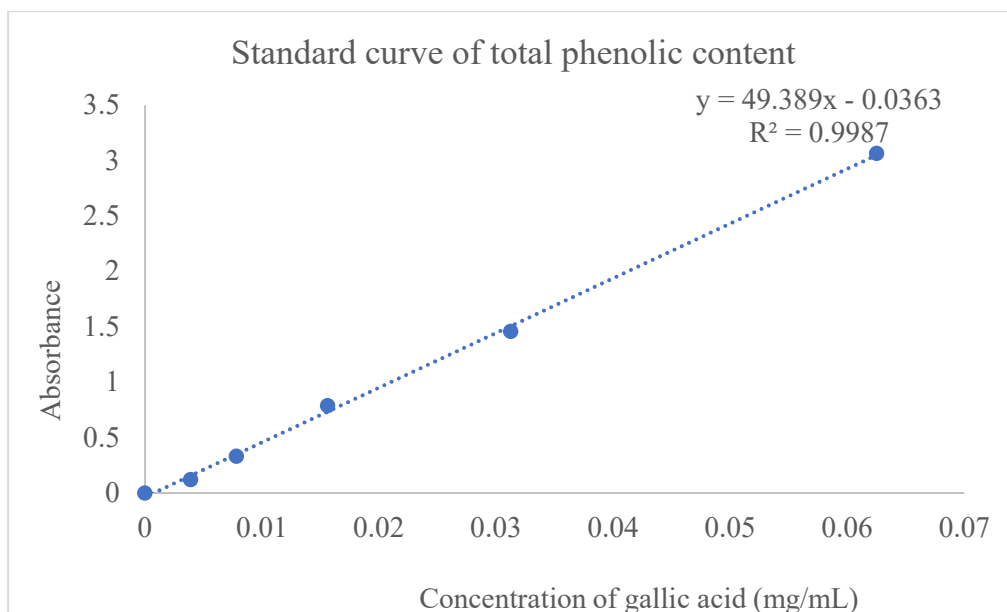

**Figure S3.** Standard curve of total phenolic content measurement with Folic Ciocalteu reagent.

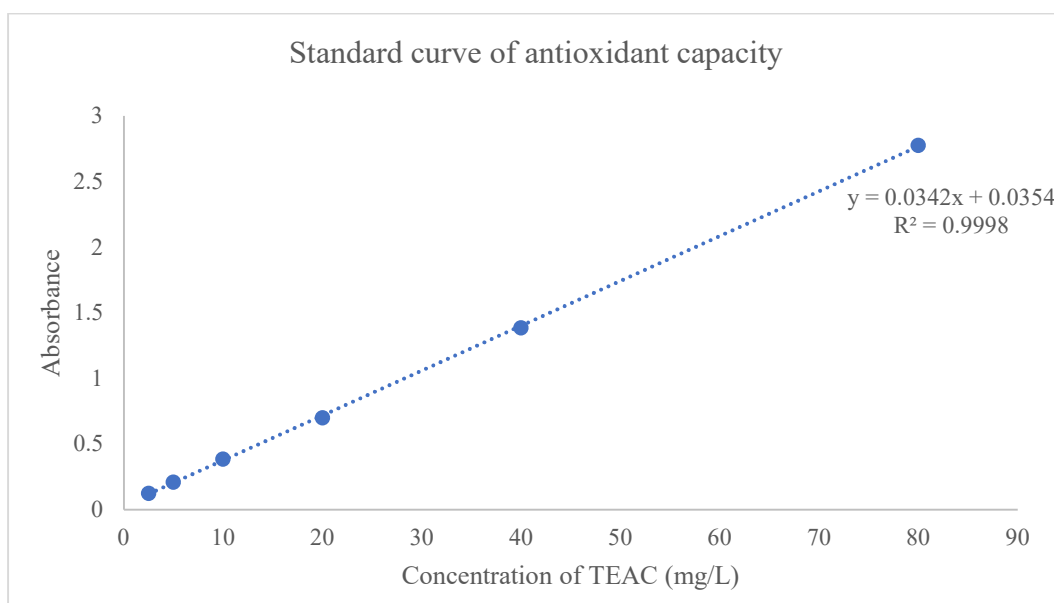

**Figure S4.** Standard curve of antioxidant capacity measured by CUPRAC method.
